# Supplementary material
Source: MDPI journal article supplement (https://www.mdpi.com/2073-4344/12/1/15)
Supplement: s1 [file s1]

# Tailoring g-C<sub>3</sub>N<sub>4</sub> with Lanthanum and Cobalt Oxides for Enhanced Photoelectrochemical and Photocatalytic Activity.

Naseer Iqbal\*

Department of Chemistry, College of Science, University of Hafr Al Batin, P.O. Box 1803, Hafr Al Batin 39524, Saudi Arabia; naseeriqbal@uhb.edu.sa; Tel.: +966137208189

## 1. Post Measurements Analysis

### 1.1. XRD Analysis:

In the post-PEC sample analysis, we scratched the used La<sub>2</sub>O<sub>3</sub>-CoO-g-C<sub>3</sub>N<sub>4</sub> photoanode and re-characterized it by XRD and SEM. XRD analysis will help investigate the stability, structural, compositional, and morphological changes in the photocatalyst in a photoelectrochemical process. The XRD pattern recorded is presented in SI. Fig. 1 (supplementary information). Multiple La oxide, hydroxide, and Co oxides phases are detected. In the post electrochemical XRD, it is evident that La<sub>2</sub>O<sub>3</sub> CoO and g C<sub>3</sub>N<sub>4</sub> peaks appeared significantly at their specified 2θ positions, as shown in figure S1, which supports the stability of the La<sub>2</sub>O<sub>3</sub>-CoO-g-C<sub>3</sub>N<sub>4</sub> photocatalyst. However, after the water-splitting process, some new peaks of low to moderate intensity are significantly observed, which are distinguished by different colors for La (OH)<sub>3</sub> and Co<sub>3</sub>O<sub>4</sub>, respectively. It happened because of electrolyte interaction with the photocatalyst under visible light and electrochemical reactions. La(OH)<sub>3</sub> can be recognized by its 2θ positions at 14.5°, 26.2°, 27.8°, 30°, 42°, 53.8° and 71.4° respectively. These 2θ values correspond to the following hkl miller indices, originating from the reflection (100), (110), (101), (200), (210), (112), and (302), respectively. This post-XRD pattern is well aligned with the standard PDF card number # 36-1481 for hexagonal P6<sub>3</sub> La(OH)<sub>3</sub>. On the other hand, due to the PEC process, some low-intensity XRD peaks from Co<sub>3</sub>O<sub>4</sub> are also observed. These can be seen at 2θ values 10.8°, 15.8°, 17.2°, 24.1°, 30°, and 33.7° respectively in Figure S1. Their corresponding hkl miller indices are (111), (220), (311), (331), (333), and (440). These peaks are in accordance with the PDF card Number 01-078-1969, a cubic phase Co<sub>3</sub>O<sub>4</sub>. In the XRD pattern of post electrochemical measurement sample, high-intensity peaks of La<sub>2</sub>O<sub>3</sub>-CoO-g-C<sub>3</sub>N<sub>4</sub> photocatalyst are also found. It is worth noting that during the PEC water splitting process, some of La<sub>2</sub>O<sub>3</sub> changed to La (OH)<sub>3</sub> hexagonal phase, and CoO oxides transformed into various cobalt oxide phases like Co<sup>(+2)</sup> Co<sup>(+3)</sup> in Co<sub>3</sub>O<sub>4</sub>. This can be another reason for enhanced PEC activity of La<sub>2</sub>O<sub>3</sub>-CoO-g-C<sub>3</sub>N<sub>4</sub> where mixed phases of La and valance states of cobalt-metal such as Co<sup>2+</sup> and Co<sup>3+</sup> coexists. It is also due to the combined effect of the metal oxide's impregnation with g-C<sub>3</sub>N<sub>4</sub> arising from the chemical coupling effects of La and Co oxides and g-C<sub>3</sub>N<sub>4</sub> support. Such behavior of Co oxides with g-C<sub>3</sub>N<sub>4</sub> towards enhanced photocatalytic activity is already reported in the literature. In summary, the differences in the XRD analysis (SI. Fig. 1) illustrated that the crystal structure of the La<sub>2</sub>O<sub>3</sub>-CoO-g-C<sub>3</sub>N<sub>4</sub> photocatalysts did not change greatly even after the photocatalytic reaction. Therefore, La<sub>2</sub>O<sub>3</sub>-CoO-g-C<sub>3</sub>N<sub>4</sub> can be regarded as stable photocatalysts for PEC water splitting reactions.

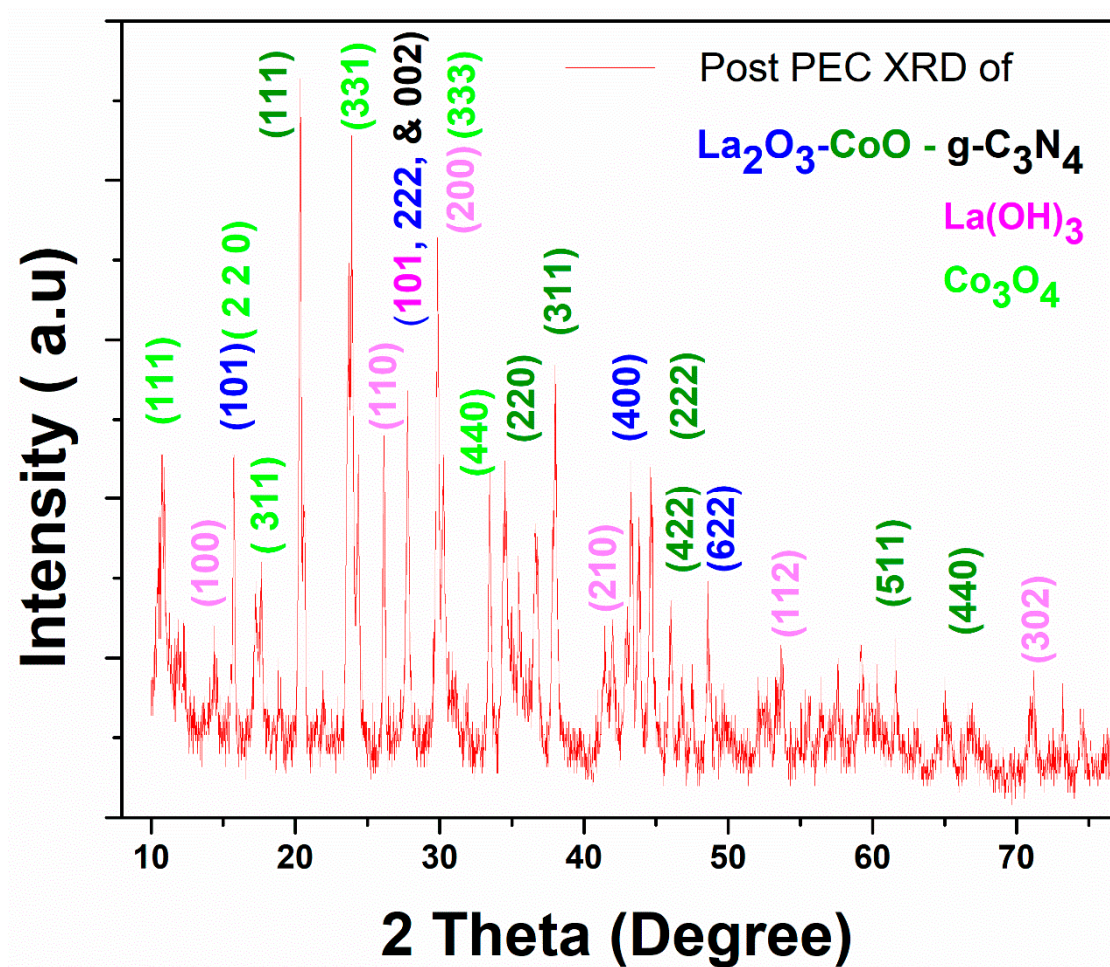

**Figure S1.** The Post PEC measurements XRD spectrum of  $\text{La}_2\text{O}_3\text{-CoO-g-C}_3\text{N}_4$ .

### 1.2. FE-SEM/EDX Analysis:

The post photoelectrochemical measurement analysis presents a comparative view of the surface topography of  $\text{La}_2\text{O}_3\text{-CoO-g-C}_3\text{N}_4$  photocatalyst prepared by hydrothermal process. The figure (SI Figure 2 a and b) describes the agglomeration of La and Co oxide nanoparticles over the  $\text{g-C}_3\text{N}_4$ . The fresh sample as of figure 2 (a & d) comprises of nanoflakes of  $\text{g-C}_3\text{N}_4$  which after the PEC water splitting reaction have been converted into rods with chunks or agglomerations of La and Co oxide nanoparticles. The XRD data (figure 1 and S1 fig1) showed significant peaks of  $\text{La}_2\text{O}_3\text{-CoO-g-C}_3\text{N}_4$  at its specified  $2\theta$  positions with significant intensities in both pre and post-PEC measurements and augmented the stability of the  $\text{La}_2\text{O}_3\text{-CoO-g-C}_3\text{N}_4$  photocatalyst. Furthermore, the EDX elemental analysis of the used  $\text{La}_2\text{O}_3\text{-CoO-g-C}_3\text{N}_4$  photocatalyst showed La, Co, O, N, and C at their relative KeV values. The post-measurement EDX analysis is compared with its pre-analysis, and it is concluded that all the key elements are present in comparable atomic intensities and are in good agreement with each other with respect of energy/electronic transitions. Thus  $\text{La}_2\text{O}_3\text{-CoO-g-C}_3\text{N}_4$ , even after the water-splitting process, signifies homogenous distribution of these elements on the surface. That resulted in enhanced PEC activity.

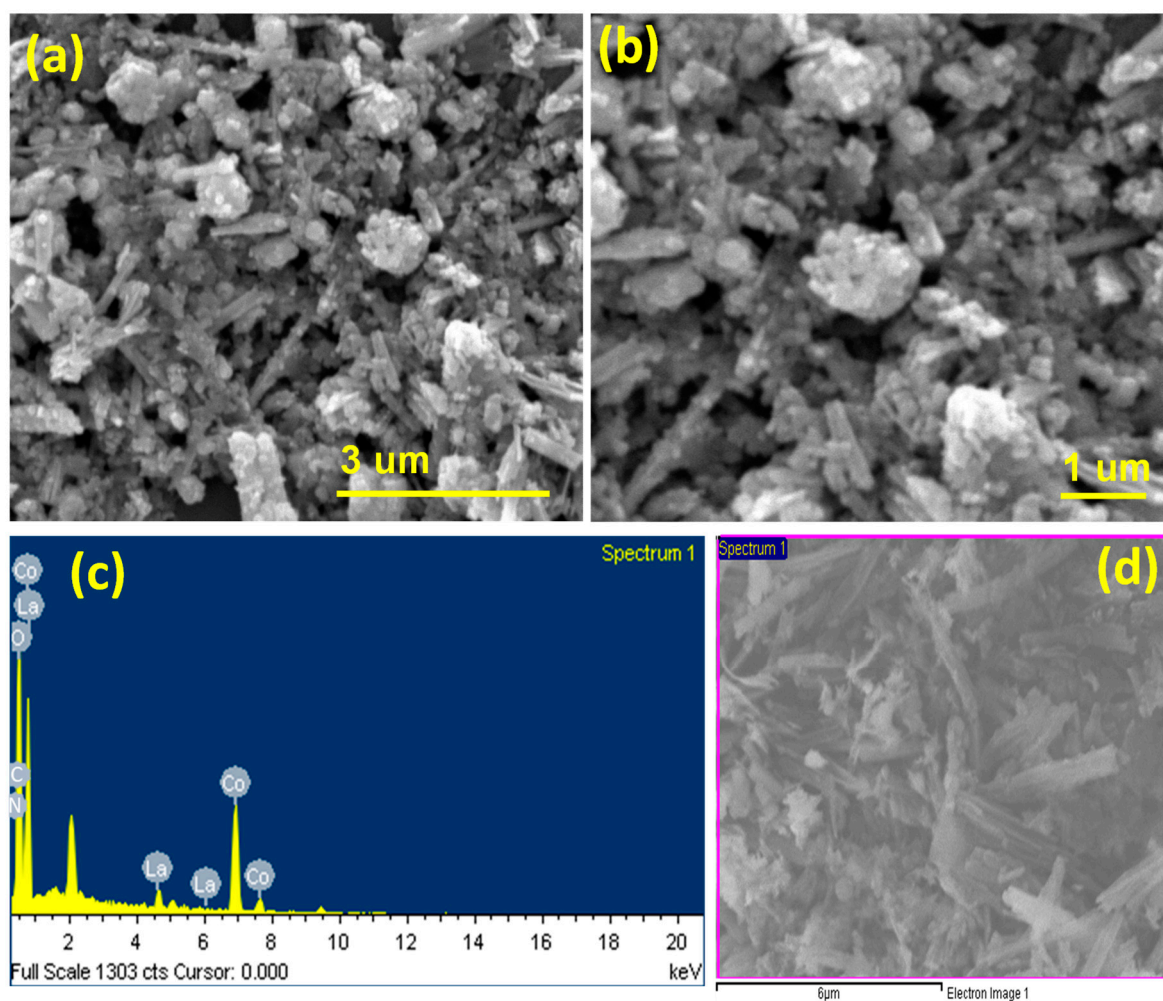

**Figure S2.** The surface morphology in post-PEC measurements of  $\text{La}_2\text{O}_3\text{-CoO-g-C}_3\text{N}_4$  (a,b). Figure S2 (c,d) shows the EDX spectrum and corresponding micrograph.
